# Supplementary material for: Modular Nano-Scaffold Biocatalysis for Superior PET Depolymerization and Valorization
Source: Research Square preprint supplement (doi:10.21203/rs.3.rs-4689499/v1), 2024-09-30
Supplement: Supplementary file 1 [file 2574226cbadb699810f1d7ad.xlsx]

## Sheet: fig2.Effect of CBM
Fig. 2. Enzyme-Scaffold Complexes Enhance PET Degradation Efficiency.
Effect of CBM
Fig. 2e. Binding affinity of PET powder
Code	Concentration of scaffolds	(C_before)-(C_after), Scaf.1 (ug/mL)					(C_before)-(C_after), Scaf.2 (ug/mL)
		Repeat 1	Repeat 2	Repeat 3	Average	SD	Repeat 1	Repeat 2	Repeat 3	Average	SD
1	2.5 uM	76.1782	76.178	76.179	76.1784	0.000429056	82.8605	84.8652	90.2111	85.9789	3.10246
2	5.0 uM	96.8934	98.2298	98.232	97.7851	0.63053	143.001	128.968	138.324	136.764	5.834
3	7.5 uM	121.618	120.95	121.619	121.395	0.315276	187.104	193.787	183.095	187.995	4.41009
Fig. 2e. Binding affinity of PET film
Code	Concentration of scaffolds	(C_before)-(C_after), Scaf.1 (ug/mL)					(C_before)-(C_after), Scaf.2 (ug/mL)
		Repeat 1	Repeat 2	Repeat 3	Average	SD	Repeat 1	Repeat 2	Repeat 3	Average	SD
1	2.5 uM	82.7414	79.3829	79.3054	80.4766	1.60176	112.482	119.398	115.346	115.742	2.83719
2	5.0 uM	100.074	97.5638	103.109	100.249	2.26739	164.028	168.282	163.199	165.17	2.22698
3	7.5 uM	123.78	127.517	130.657	127.318	2.81091	248.021	251.608	259.308	252.979	4.70884

## Sheet: fig.2 Complex-A_B
Fig. 2. Enzyme-scaffold complexes enhance PET degradation efficiency.
Degradation by complex-A_B
Sample construction (at 30℃ pH 7.0, Enz.:Scaf.=0.2:1)
Code	Enzymes		Scaffolds
	FAST	MHETase	Scaf.1	Scaf.2
1	+
2		+
3	+	+
4	+	+	+		Complex-A
5	+	+		+	Complex-B
Fig. 2f. 96 h reaction products (PET powder)
Code	TPA (mM)					MHET (mM)					BHET (mM)					Total (mM)
	Repeat 1	Repeat 2	Repeat 3	Average	SD	Repeat 1	Repeat 2	Repeat 3	Average	SD	Repeat 1	Repeat 2	Repeat 3	Average	SD	Repeat 1	Repeat 2	Repeat 3	Average	SD
1	7.98713	7.9902	7.39009	7.78914	0.282173	1.22194	1.22073	1.17054	1.2044	0.0239513	0	0	0	0	0	9.20906	9.21094	8.56063	8.99354	0.306118
2	0.05175	0.05175	0.05175	0.05175	0	0	0	0	0	0	0	0	0	0	0	0.05175	0.05175	0.05175	0.05175	0
3	10.1598	9.49085	9.322	9.65754	0.361764	0.568393	0.551382	0.589941	0.569905	0.0157776	0	0	0	0	0	10.7282	10.0422	9.91194	10.2274	0.358039
4	18.1725	17.9286	17.8635	17.9882	0.132996	2.36538	2.38635	2.41467	2.3888	0.0201974	0	0	0	0	0	20.5379	20.315	20.2782	20.377	0.11474
5	19.375	19.147	19.9522	19.4914	0.338877	2.62097	2.58692	2.64516	2.61768	0.0238881	0	0	0	0	0	21.996	21.7339	22.5974	22.1091	0.361465
Fig. 2g. 96 h reaction products (PET film-L)
Code	TPA (mM)					MHET (mM)					BHET (mM)					Total (mM)
	Repeat 1	Repeat 2	Repeat 3	Average	SD	Repeat 1	Repeat 2	Repeat 3	Average	SD	Repeat 1	Repeat 2	Repeat 3	Average	SD	Repeat 1	Repeat 2	Repeat 3	Average	SD
1	6.32104	6.83261	6.93053	6.69472	0.267244	0.718282	0.640055	0.640842	0.666393	0.0366927	0	0	0	0	0	7.03932	7.47266	7.57137	7.36112	0.231087
2	0.0414	0.0414	0.0414	0.0414	0	0	0	0	0	0	0	0	0	0	0	0.0414	0.0414	0.0414	0.0414	0
3	7.84339	8.94334	9.21156	8.6661	0.591956	0.156522	0.140438	0.150055	0.149005	0.00660783	0	0	0	0	0	7.99992	9.08378	9.36162	8.8151	0.587479
4	14.7694	15.5566	17.1867	15.8376	1.00663	0.02744	0	0	0.00914667	0.0129353	0	0	0	0	0	14.7968	15.5566	17.1867	15.8467	0.996964
5	14.3943	18.2464	19.2323	17.291	2.08745	0	0	0	0	0	0	0	0	0	0	14.3943	18.2464	19.2323	17.291	2.08745
Fig. 2h. 96 h reaction products (PET film-H)
Code	TPA (mM)					MHET (mM)					BHET (mM)					Total (mM)
	Repeat 1	Repeat 2	Repeat 3	Average	SD	Repeat 1	Repeat 2	Repeat 3	Average	SD	Repeat 1	Repeat 2	Repeat 3	Average	SD	Repeat 1	Repeat 2	Repeat 3	Average	SD
1	0.340857	0.320105	0.289755	0.316906	0.0209846	0	0	0	0	0	0	0	0	0	0	0.340857	0.320105	0.289755	0.316906	0.0209846
2	0	0	0	0	0	0	0	0	0	0	0	0	0	0	0	0	0	0	0	0
3	0.683689	0.654812	0.674651	0.671051	0.0120609	0.00970278	0.00274572	0.00243945	0.00496265	0.00335411	0	0	0	0	0	0.693392	0.657557	0.67709	0.676013	0.0146491
4	0.709809	0.71432	0.678907	0.701012	0.0157386	0.0212226	0.010692	0.00848203	0.0134655	0.00555875	0	0	0	0	0	0.731031	0.725012	0.687389	0.714477	0.0193113
5	0.709802	0.643666	0.768797	0.707422	0.0511122	0.021216	0.00646294	0.0131852	0.0136214	0.0060308	0.00866244	0.00636463	0.00811647	0.00771451	0.000980189	0.73968	0.656494	0.790099	0.728758	0.0550882

## Sheet: fig.3 Complex-C
Fig. 3. MHETase optimization for enhanced expression, scaffold binding, and PET degradation.
Degradation by complex-C
Sample construction (at 30℃ pH 7.0, Enz.:Scaf.=0.2:1)
Code	Enzymes		Scaffold
	FAST	MHETase	Scaf.3
1	+
2		+
3	+	+
4	+	+	+	Complex-C
Fig. 3f. 96 h reaction products (PET powder)
Code	TPA (mM)					MHET (mM)					BHET (mM)
	Repeat 1	Repeat 2	Repeat 3	Average	SD	Repeat 1	Repeat 2	Repeat 3	Average	SD	Repeat 1	Repeat 2	Repeat 3	Average	SD
1	8.50112	7.06782	6.93841	7.50245	0.708139	0.836684	0.931594	0.92169	0.896656	0.0425991	0.14282	0.141707	0.139292	0.141273	0.00147248
2	0	0	0	0	0	0	0	0	0	0	0	0	0	0	0
3	13.8963	16.6036	13.7235	14.7411	1.31884	0	0	0	0	0	0.209684	0.212794	0.211156	0.211211	0.00127005
4	23.3056	24.2028	19.5866	22.365	1.9985	1.81331	1.33956	1.72305	1.62531	0.205384	0.2865	0.2976	0	0.1947	0.137748
Fig. 3g. 96 h reaction products (PET film-L)
Code	TPA (mM)					MHET (mM)					BHET (mM)
	Repeat 1	Repeat 2	Repeat 3	Average	SD	Repeat 1	Repeat 2	Repeat 3	Average	SD	Repeat 1	Repeat 2	Repeat 3	Average	SD
5	7.13458	6.47394	6.53958	6.71603	0.297171	0	0	0	0	0	0.0585	0.05976	0.0595	0.0592533	0.000543159
6	0	0	0	0	0	0	0	0	0	0	0	0	0	0	0
7	15.1031	16.2256	17.8512	16.3933	1.12815	0	0	0	0	0	0.202444	0.21369	0.196216	0.204117	0.00723117
8	21.9306	23.1146	24.6193	23.2215	1.10023	0	0	0	0	0	0.261223	0.267149	0.266355	0.264909	0.00262619
Fig. 3h. 96 h reaction products (PET film-H)
Code	TPA (mM)					MHET (mM)					BHET (mM)
	Repeat 1	Repeat 2	Repeat 3	Average	SD	Repeat 1	Repeat 2	Repeat 3	Average	SD	Repeat 1	Repeat 2	Repeat 3	Average	SD
9	0.288922	0.306108	0.349984	0.315005	0.0257099	0	0	0	0	0	0	0	0	0	0
10	0	0	0	0	0	0	0	0	0	0	0	0	0	0	0
11	0.68721	0.60627	0.691172	0.66155	0.0391229	0	0	0	0	0	0.0622286	0.0644779	0.060983	0.0625632	0.00144623
12	0.771262	0.863816	0.858471	0.831183	0.0424267	0	0	0	0	0	0.0581444	0.0593295	0.0591707	0.0588816	0.000525238

## Sheet: fig4. Complex-D
Fig. 4. Scaffold engineering further enhances PET degradation with a three-enzyme complex.
Degradation by complex-D
Sample construction (at 30℃ pH 7.0, Enz.:Scaf.=0.2:1)
Code	Enzymes			Scaffold
	FAST	MHETase	ICCG	Scaf.3
1	+
2		+
3			+
4	+	+
5	+	+		+
6	+		+
7	+		+	+
8		+	+
9		+	+	+
10	+	+	+
11	+	+	+	+	Complex-D
Fig. 4b. 96 h reaction products (PET powder)
Code	TPA (mM)					MHET (mM)					BHET (mM)
	Repeat 1	Repeat 2	Repeat 3	Average	SD	Repeat 1	Repeat 2	Repeat 3	Average	SD	Repeat 1	Repeat 2	Repeat 3	Average	SD
1	11.4812	11.3555	10.3086	11.0484	0.525632	3.3532	3.35441	3.07502	3.26088	0.131421	0	0	0	0	0
2	0	0	0	0	0	0	0	0	0	0	0	0	0	0	0
3	12.6872	13.8517	14.2477	13.5955	0.662313	3.77399	4.47322	4.42711	4.22477	0.319304	0	0	0	0	0
4	16.6295	14.7765	14.7749	15.3936	0.873883	0	0	0	0	0	0	0	0	0	0
5	18.0424	16.8317	22.4288	19.101	2.40447	0	0	0	0	0	0	0	0	0	0
6	16.6827	18.5982	19.2497	18.1769	1.08951	4.94892	5.92783	5.86327	5.58001	0.447026	0	0	0	0	0
7	17.2979	14.5245	17.2729	16.3651	1.30155	12.0681	12.6036	12.1517	12.2745	0.235236	0	0	0	0	0
8	22.768	26.5337	22.1726	23.8248	1.93084	0	0	0	0	0	0	0	0	0	0
9	30.4871	24.7438	29.5011	28.244	2.50754	0	0	0	0	0	0	0	0	0	0
10	31.8393	27.6622	39.6957	33.0657	4.9886	0	0	0	0	0	0	0	0	0	0
11	47.451	44.0039	42.5221	44.659	2.06486	0	0	0	0	0	0	0	0	0	0
Fig. 4c. 96 h reaction products (PET film-L)
Code	TPA (mM)					MHET (mM)					BHET (mM)
	Repeat 1	Repeat 2	Repeat 3	Average	SD	Repeat 1	Repeat 2	Repeat 3	Average	SD	Repeat 1	Repeat 2	Repeat 3	Average	SD
1	7.9284	9.6804	8.51619	8.70833	0.728041	0	0	0	0	0	0	0	0	0	0
2	0	0	0	0	0	0	0	0	0	0	0	0	0	0	0
3	17.5868	14.4698	16.5144	16.1903	1.29298	6.67867	8.20941	7.402	7.43002	0.625236	0	0	0	0	0
4	13.8927	13.9195	15.0361	14.2827	0.532801	0	0	0	0	0	0	0	0	0	0
5	15.1792	17.6897	14.7823	15.8837	1.28723	1.49537	0.496632	0.496632	0.829546	0.470811	0.886578	1.08964	0.821523	0.932579	0.114188
6	16.5537	18.2073	14.4317	16.3975	1.54534	5.93826	6.73971	5.47099	6.04965	0.523908	0	0	0	0	0
7	18.0828	18.7521	18.2181	18.351	0.288968	7.47581	10.4864	8.87764	8.9466	1.23002	0	0	0	0	0
8	22.2802	25.9776	26.9205	25.0594	2.00256	0	0	0	0	0	0	0	0	0	0
9	28.069	32.8416	29.2857	30.0654	2.02492	0	0	0	0	0	0	0	0	0	0
10	36.5627	37.0351	34.665	36.0876	1.02426	0	0	0	0	0	0	0	0	0	0
11	47.6132	47.3164	52.1686	49.0328	2.2207	0	0	0	0	0	0	0	0	0	0
Fig. 4d. 96 h reaction products (PET film-H)
Code	TPA (mM)					MHET (mM)					BHET (mM)
	Repeat 1	Repeat 2	Repeat 3	Average	SD	Repeat 1	Repeat 2	Repeat 3	Average	SD	Repeat 1	Repeat 2	Repeat 3	Average	SD
1	0.299743	0.350759	0.27706	0.309187	0.0308201	0	0	0	0	0	0.0246415	0.0193199	0.0189705	0.0209773	0.00259491
2	0	0	0	0	0	0	0	0	0	0	0	0	0	0	0
3	0.545013	0.532228	0.169738	0.41566	0.173971	0	0	0	0	0	0.0505885	0.0544756	0.0353989	0.046821	0.00823106
4	0.208994	0.553501	0.595432	0.452642	0.173134	0	0	0	0	0	0	0	0	0	0
5	0.591662	0.602314	0.561859	0.585278	0.0171214	0	0.0379449	0.0176594	0.0185348	0.0155033	0.0589568	0.0335567	0.043643	0.0453855	0.0104425
6	0.630193	0.566517	0.550626	0.582445	0.0343808	0	0.00743278	0.00765404	0.00502894	0.00355714	0	0	0	0	0
7	0.588292	0.628803	0.594652	0.603916	0.0177886	0	0.0173697	0.0296386	0.0156694	0.0121595	0	0	0	0	0
8	0.570637	0.550048	0.574862	0.565182	0.0108398	0	0	0	0	0	0	0	0	0	0
9	0.613251	0.61953	0.557175	0.596652	0.0280317	0	0	0	0	0	0.0283832	0.0171382	0.023732	0.0230845	0.00461353
10	0.893762	0.982464	0.897454	0.92456	0.0409717	0	0	0	0	0	0.0171395	0.0180773	0	0.0117389	0.0083095
11	1.35142	1.25129	1.27535	1.29269	0.0426786	0	0	0	0	0	0.026158	0.0261418	0.036888	0.0297293	0.005062

## Sheet: fig5. ratio of Enz._Scaf.
Fig. 5. Optimization of SPEED reaction conditions.
Different ratio of Enz._Scaf.
Sample construction (at 30℃ pH 7.0)
Code	Enz.:Scaf.	Enzymes			Scaffold
		FAST	MHETase	ICCG	Scaf.3
1	0.2:1	+	+	+
2		+	+	+	+
3	0.25:1	+	+	+
4		+	+	+	+
5	0.33:1	+	+	+
6		+	+	+	+
7	0.5:1	+	+	+
8		+	+	+	+
9	1:1	+	+	+
10		+	+	+	+
Fig. 5b. 96 h reaction products (PET powder)
Code	TPA (mM)					MHET (mM)					BHET (mM)
	Repeat 1	Repeat 2	Repeat 3	Average	SD	Repeat 1	Repeat 2	Repeat 3	Average	SD	Repeat 1	Repeat 2	Repeat 3	Average	SD
1	20.8669	23.323	22.3975	22.1958	1.0128	0.397379	2.35964	0.328547	1.02852	0.941661	0.902011	0.828593	0.834445	0.855016	0.0333158
2	35.6235	38.3069	38.2	37.3768	1.24055	0.610849	0	0	0.203616	0.287957	0.995426	0.603263	0.730926	0.776538	0.163316
3	28.5557	29.4926	28.5931	28.8805	0.433104	3.1412	0	0.170463	1.10389	1.44228	0.933921	0.603263	0.820629	0.785938	0.137201
4	45.6824	46.9538	50.78	47.8054	2.16644	0.374217	0	0	0.124739	0.176408	0.960667	0.603263	0.785116	0.783015	0.145917
5	38.2683	35.6397	35.5711	36.493	1.25561	12.8428	0.417941	0	4.42024	5.95808	0.603263	1.25998	0.908001	0.923748	0.268334
6	65.859	64.6069	66.4369	65.6343	0.763794	0	0.0484462	0.489546	0.179331	0.220245	0.603263	0.790448	1.11128	0.834996	0.209775
7	68.7616	62.7701	61.745	64.4256	3.09443	1.18519	0	0	0.395063	0.558703	0.809478	0.603263	0.647757	0.686833	0.0886053
8	107.427	104.884	109.97	107.427	2.07637	0	0	0.78784	0.262613	0.371392	0.603263	0.603263	0.674295	0.62694	0.0334847
9	126.518	119.871	117.857	121.416	3.70073	2.43091	0	0.665948	1.03229	1.02567	0.876311	0.603263	0.603263	0.694279	0.128716
10	154.518	153.569	150.649	152.912	1.64644	6.1848	2.03865	0.729672	2.98437	2.32528	0.909535	0.603263	0.603263	0.705354	0.144378
Fig. 5b. 96 h reaction products (PET powder)
Code	Total products (mM)
	Repeat 1	Repeat 2	Repeat 3	Average	SD
1	22.1663	26.5113	23.5605	24.0793	1.81137
2	37.2298	38.9102	38.931	38.357	0.797097
3	32.6309	30.0959	29.5842	30.7703	1.33211
4	47.0173	47.5571	51.5651	48.7132	2.02863
5	51.7144	37.3176	36.4792	41.837	6.9927
6	66.4623	65.4458	68.0377	66.6486	1.06631
7	70.7562	63.3734	62.3928	65.5075	3.73295
8	108.03	105.487	111.432	108.317	2.43544
9	129.826	120.474	119.126	123.142	4.75787
10	161.613	156.21	151.982	156.602	3.94141

## Sheet: fig5. Different temperature
Fig. 5. Optimization of SPEED reaction conditions.
Different temperature
Sample construction (at pH 7.0, Enz.:Scaf.=0.5:1)
Code	Temperature	Enzymes			Scaffold
		FAST	MHETase	ICCG	Scaf.3
1	30℃	+
2			+
3				+
4		+	+	+
5		+	+	+	+
6	40℃	+
7			+
8				+
9		+	+	+
10		+	+	+	+
11	50℃	+
12			+
13				+
14		+	+	+
15		+	+	+	+
16	60℃	+
17			+
18				+
19		+	+	+
20		+	+	+	+
21	70℃	+
22			+
23				+
24		+	+	+
25		+	+	+	+
Fig. 5c. 96 h reaction products (PET powder)
Code	TPA (mM)					MHET (mM)					BHET (mM)
	Repeat 1	Repeat 2	Repeat 3	Average	SD	Repeat 1	Repeat 2	Repeat 3	Average	SD	Repeat 1	Repeat 2	Repeat 3	Average	SD
1	13.2348	13.9743	12.7546	13.3212	0.501702	14.2304	14.6113	13.2002	14.014	0.596061	0.590569	0.589572	0.59359	0.591244	0.00170839
2	0	0	0	0	0	0	0	0	0	0	0	0	0	0	0
3	12.961	15.0198	13.6061	13.8623	0.859805	10.2042	10.892	10.4316	10.5093	0.286097	0.611181	0.607638	0.600638	0.606486	0.00438062
4	98.7142	109.349	96.262	101.442	5.68008	1.9826	2.24562	1.37159	1.86661	0.366126	0.618892	0.639177	0.589474	0.615848	0.020405
5	131.221	132.671	130.758	131.55	0.814838	0	2.09659	0.929011	1.00853	0.857774	0.696001	0.651035	0.627652	0.658229	0.0283636
6	31.9659	33.979	36.1881	34.0443	1.72434	7.87376	7.78721	9.33091	8.33063	0.70819	0.568556	0.558551	0.59062	0.572576	0.013397
7	0	0	0	0	0	0	0	0	0	0	0	0	0	0	0
8	33.781	30.7704	30.1865	31.5793	1.57499	23.0605	17.7123	16.8176	19.1968	2.75637	0.696899	0.650531	0.6471	0.664843	0.02271
9	119.468	118.342	119.842	119.217	0.637689	1.40727	1.09506	1.45342	1.31858	0.159175	0.603578	0.590312	0.620442	0.604777	0.0123296
10	152.137	149.882	152.43	151.483	1.13815	0	0	0.399975	0.133325	0.18855	0.746213	0.682683	0.53	0.652966	0.0907356
11	22.5804	28.228	24.3433	25.0506	2.3592	18.5896	6.97263	5.59611	10.3861	5.82788	0.615862	0.574543	0.55336	0.581255	0.0259542
12	0	0	0	0	0	0	0	0	0	0	0	0	0	0	0
13	65.611	61.8902	68.4639	65.3217	2.69145	27.624	23.2221	25.9772	25.6078	1.81596	0.714067	0.677138	0.68622	0.692475	0.0157113
14	94.9302	93.8863	102.446	97.0874	3.81275	32.4538	32.5578	28.3882	31.1333	1.94153	0.71093	0.756187	0.754242	0.740453	0.0208912
15	148.656	143.991	148.894	147.18	2.25746	15.4574	16.7922	16.1136	16.1211	0.544916	0.669828	0.680751	0.644996	0.665192	0.0149606
16	22.5804	28.4012	24.3724	25.118	2.43409	18.5896	16.5841	18.0553	17.743	0.847998	0.615862	0.641492	0.558202	0.605185	0.0348308
17	5.33213	5.07825	4.87443	5.09494	0.187226	0.914974	0.819554	0.834053	0.856194	0.0419831	0.535873	0.534818	0.53	0.533564	0.00255639
18	121.443	107.803	118.64	115.962	5.8816	7.28423	5.12254	5.42152	5.94276	0.95638	0	0	0	0	0
19	128.554	119.094	122.531	123.393	3.90972	36.9738	32.1042	30.4147	33.1642	2.78066	0.73157	0.783138	0.682101	0.73227	0.041251
20	149.034	150.82	119.084	139.646	14.5579	23.4398	22.4317	23.1557	23.009	0.424394	0.635795	0.637838	0.767897	0.68051	0.0617973
21	7.19148	5.7097	6.13075	6.34398	0.62344	0.871414	0.861665	0.8312	0.85476	0.0171283	0.53	0.603945	0.53	0.554648	0.034858
22	6.31705	5.62121	5.74288	5.89372	0.303439	0.119215	0.0981584	0.105369	0.107581	0.00873718	0	0	0	0	0
23	61.6805	90.3012	91.9705	81.3174	13.9021	33.1994	44.552	37.5759	38.4425	4.67501	0.657733	0.781755	0.712858	0.717449	0.0507358
24	172.931	126.666	137.578	145.725	19.7469	23.8122	22.9958	32.5462	26.4514	4.32255	0.682937	0.660488	0.738522	0.693982	0.0328006
25	134.991	148.995	153.87	145.952	8.00213	37.9891	41.3816	50.722	43.3643	5.38391	0.717277	0.80508	0.858853	0.793737	0.0583519

## Sheet: fig5. Different pH
Fig. 5. Optimization of SPEED reaction conditions.
Different pH
Sample construction (at 40℃, Enz.:Scaf.=0.5:1)
Code	pH	Enzymes			Scaffold
		FAST	MHETase	ICCG	Scaf.3
1	5	+
2			+
3				+
4		+	+	+
5		+	+	+	+
6	6	+
7			+
8				+
9		+	+	+
10		+	+	+	+
11	7	+
12			+
13				+
14		+	+	+
15		+	+	+	+
16	8	+
17			+
18				+
19		+	+	+
20		+	+	+	+
21	9	+
22			+
23				+
24		+	+	+
25		+	+	+	+
Fig. 5d. 96 h reaction products (PET powder)
Code	TPA (mM)					MHET (mM)					BHET (mM)
	Repeat 1	Repeat 2	Repeat 3	Average	SD	Repeat 1	Repeat 2	Repeat 3	Average	SD	Repeat 1	Repeat 2	Repeat 3	Average	SD
1	5.91436	5.34183	6.20868	5.82162	0.359913	0.510216	0.378866	0.318132	0.402404	0.080165	1.06787	1.02312	1.06628	1.05242	0.0207279
2	0	0	0	0	0	0	0	0	0	0	0	0	0	0	0
3	18.4921	19.6985	17.227	18.4725	1.00906	2.94065	3.10882	3.21094	3.08681	0.111439	0.747836	0.747687	0.76053	0.752018	0.00601924
4	84.6169	89.8696	80.4022	84.9629	3.8728	1.52626	1.4058	1.21678	1.38295	0.127378	0.691024	0.742598	0.691024	0.708215	0.0243124
5	140.626	143.265	121.015	134.969	9.92541	0.507877	0.560099	0.570348	0.546108	0.0273551	0.728664	0.682799	0.733337	0.714933	0.0228022
6	19.0137	22.578	19.705	20.4322	1.5433	8.22113	10.3749	8.69324	9.09642	0.92433	0.887718	0.934733	0.900976	0.907809	0.0197925
7	0	0	0	0	0	0	0	0	0	0	0	0	0	0	0
8	17.2139	19.3992	16.6538	17.7556	1.18443	29.7991	29.3577	28.229	29.1286	0.661122	0.993507	1.02417	0.990647	1.00277	0.0151728
9	80.1349	99.3497	105.564	95.0161	10.8241	0.850779	0.785807	0.764661	0.800416	0.0366434	0.757357	0.741022	0.738187	0.745522	0.00844816
10	167.379	129.299	171.184	155.954	18.9118	1.15892	1.2411	1.36572	1.25525	0.0850164	0.743842	0.732517	0.6625	0.712953	0.035974
11	49.941	49.4037	59.0652	52.8033	4.43329	5.7751	6.07961	6.66233	6.17235	0.368097	0.754079	0.754079	0.754079	0.754079	0
12	0	0	0	0	0	0	0	0	0	0	0	0	0	0	0
13	61.4665	69.1097	69.9919	66.856	3.82794	5.1573	5.69905	5.86389	5.57341	0.301836	0.986873	0.900262	0.87584	0.920992	0.0476399
14	135.926	127.605	127.511	130.347	3.94492	1.15567	0.808237	0.340481	0.768128	0.334004	0.997576	0.951332	0.949888	0.966265	0.0221477
15	176.554	188.413	159.153	174.707	12.0165	0.568231	0.783126	0.673894	0.675084	0.0877342	0.980239	1.04684	1.03337	1.02015	0.028751
16	57.5368	62.1117	55.3038	58.3174	2.83356	6.98297	6.87279	6.75237	6.86938	0.0941726	0.754079	0.754079	0.754079	0.754079	0
17	0	0	0	0	0	0	0	0	0	0	0	0	0	0	0
18	17.3538	12.0198	14.0557	14.4764	2.19784	29.5436	30.6154	32.4482	30.8691	1.19927	0	0	0	0	0
19	81.3159	76.8172	76.767	78.3	2.13266	0.710415	0.761192	0.795691	0.755766	0.0350243	0.712249	0.678413	0.720378	0.70368	0.0181723
20	149.702	126.518	115.772	130.664	14.1588	0.59455	0.585897	0.53141	0.570619	0.0279494	0.734321	0.702857	0.678413	0.705197	0.0228843
21	15.9513	16.4278	17.0724	16.4838	0.459385	53.986	54.8699	53.0925	53.9828	0.725652	0.6625	1.02002	0.6625	0.781673	0.168537
22	0	0	0	0	0	0	0	0	0	0	0	0	0	0	0
23	11.055	11.8937	12.2883	11.7457	0.514229	19.6906	20.8647	22.0097	20.855	0.946805	0.880951	0.89005	0.926698	0.899233	0.0197726
24	49.0354	48.1438	32.7616	43.3136	7.47026	0.0708814	0.0708814	0.756609	0.299457	0.323255	0.712042	0.712042	0.712042	0.712042	1.11022e-16
25	62.2374	77.199	61.8794	67.1053	7.13881	0.0354593	0.853096	0.0354593	0.308005	0.385438	0.691024	0.691024	0.691024	0.691024	0

## Sheet: fig5. PET powder
Fig. 5
Time course-PET powder
Sample construction (at 40℃ pH 7.0, Enz.:Scaf.=0.5:1)
Code	Time	Enzymes			Scaffold
		FAST	MHETase	ICCG	Scaf.3
1	1 d	+	+	+
2		+	+	+	+
3	2 d	+	+	+
4		+	+	+	+
5	3 d	+	+	+
6		+	+	+	+
7	4 d	+	+	+
8		+	+	+	+
9	7 d	+	+	+
10		+	+	+	+
11	10 d	+	+	+
12		+	+	+	+
13	14 d	+	+	+
14		+	+	+	+
15	17 d	+	+	+
16		+	+	+	+
Fig. 5d. Reaction products
Code	TPA (mM)					MHET (mM)					BHET (mM)
	Repeat 1	Repeat 2	Repeat 3	Average	SD	Repeat 1	Repeat 2	Repeat 3	Average	SD	Repeat 1	Repeat 2	Repeat 3	Average	SD
1	60.7461	53.2449	50.9048	54.9653	4.1978	0	0	0	0	0	0	0	0	0	0
2	63.6901	51.7769	54.0811	56.516	5.15931	0	0.0413804	0	0.0137935	0.0195069	0	0	0	0	0
3	92.0252	108.323	116.598	105.648	10.2083	0	2.68126	3.14335	1.94154	1.38577	0	1.78332	0	0.594441	0.840666
4	119.477	128.31	112.171	119.986	6.59839	0	0	0	0	0	0	0	0	0	0
5	91.6605	116.476	121.851	109.996	13.1493	0	2.13001	2.84011	1.65671	1.20681	0	1.71459	0	0.57153	0.808266
6	118.279	127.52	151.277	132.359	13.8989	0	1.56452	2.41889	1.3278	1.00159	0	0	0	0	0
7	132.19	132.167	118.532	127.63	6.43318	0	0	0	0	0	0	0	0	0	0
8	133.595	133.574	153.731	140.3	9.49719	0.642143	0.951752	2.66223	1.41871	0.888339	1.82418	1.91292	2.39181	2.04297	0.249311
9	129.844	141.285	120.897	130.675	8.3444	0	0	0	0	0	0	0	0	0	0
10	137.509	159.374	154.031	150.304	9.30707	0	0	0	0	0	0	0	0	0	0
11	147.293	134.185	107.778	129.752	16.4337	0	0	0	0	0	0	0	0	0	0
12	180.565	186.261	149.477	172.101	16.1657	0	0	0	0	0	0	0	0	0	0
13	114.97	139.026	148.836	134.277	14.2277	0	2.10193	1.63332	1.24508	0.900951	0	1.95432	1.84384	1.26605	0.896371
14	153.968	164.127	186.365	168.154	13.5292	2.45986	2.14592	3.52934	2.71171	0.592187	1.86686	2.01556	2.24986	2.0441	0.157656
15	126.125	168.921	172.792	155.946	21.1456	0	0	0	0	0	0	0	0	0	0
16	147.55	162.665	200.332	170.182	22.1942	1.39204	1.24866	3.12511	1.92194	0.852785	1.91085	2.0659	2.44278	2.13984	0.223367
Fig. 5d. Reaction products
Code	Total products (mM)
	Repeat 1	Repeat 2	Repeat 3	Average	SD
1	60.7461	53.2449	50.9048	54.9653	4.1978
2	63.6901	51.8183	54.0811	56.5298	5.14666
3	92.0252	112.787	119.741	108.184	11.7737
4	119.477	128.31	112.171	119.986	6.59839
5	91.6605	120.321	124.691	112.224	14.6496
6	118.279	129.084	153.696	133.686	14.8204
7	132.19	132.167	118.532	127.63	6.43318
8	136.061	136.438	158.785	143.762	10.6243
9	129.844	141.285	120.897	130.675	8.3444
10	137.509	159.374	154.031	150.304	9.30707
11	147.293	134.185	107.778	129.752	16.4337
12	180.565	186.261	149.477	172.101	16.1657
13	114.97	143.082	152.313	136.788	15.8816
14	158.295	168.289	192.145	172.909	14.2002
15	126.125	168.921	172.792	155.946	21.1456
16	150.853	165.979	205.9	174.244	23.2204

## Sheet: fig5. PET film-L
Fig. 5
Time course-PET film-L
Sample construction (at 40℃ pH 7.0, Enz.:Scaf.=0.5:1)
Code	Time	Enzymes			Scaffold
		FAST	MHETase	ICCG	Scaf.3
1	1 d	+	+	+
2		+	+	+	+
3	2 d	+	+	+
4		+	+	+	+
5	3 d	+	+	+
6		+	+	+	+
7	4 d	+	+	+
8		+	+	+	+
9	7 d	+	+	+
10		+	+	+	+
11	10 d	+	+	+
12		+	+	+	+
13	14 d	+	+	+
14		+	+	+	+
15	17 d	+	+	+
16		+	+	+	+
Fig. 5e. Reaction products
Code	TPA (mM)					MHET (mM)					BHET (mM)
	Repeat 1	Repeat 2	Repeat 3	Average	SD	Repeat 1	Repeat 2	Repeat 3	Average	SD	Repeat 1	Repeat 2	Repeat 3	Average	SD
1	53.1303	52.3323	39.3376	48.2667	6.32224	0	0	0	0	0	0	0	0	0	0
2	80.9487	82.5591	83.8703	82.4594	1.19484	0	0	1.24068	0.41356	0.584862	0	0	0	0	0
3	66.8868	55.1194	57.4962	59.8341	5.08053	0	0	0	0	0	0	0	0	0	0
4	67.6304	88.3964	91.6269	82.5512	10.6327	0	0	1.86136	0.620452	0.877452	1.67178	1.71254	1.95687	1.78039	0.125891
5	87.0148	77.7776	48.9037	71.232	16.2326	0	0	0	0	0	0	0	0	0	0
6	71.2001	93.3688	105.818	90.1291	14.3173	0	0	0	0	0	0	0	0	0	0
7	102.399	127.282	96.1592	108.613	13.444	0	0	0	0	0	0	0	0	0	0
8	148.378	128.953	162.912	146.747	13.9115	0	0	1.27785	0.425949	0.602383	0	2.32793	2.61261	1.64685	1.17028
9	126.289	124.816	158.816	136.64	15.6922	0	0	2.52968	0.843226	1.1925	0	1.9264	0	0.642135	0.908115
10	171.607	130.825	209.913	170.782	32.2928	0	0	2.81543	0.938477	1.32721	2.14211	2.33519	3.1444	2.54057	0.434192
11	158.032	123.745	159.521	147.099	16.5249	0	0	0	0	0	0	0	0	0	0
12	179.093	181.721	194.308	185.041	6.64025	0	0	0	0	0	0	0	0	0	0
13	145.628	152.818	160.332	152.926	6.00322	0	0	2.5262	0.842065	1.19086	2.25698	2.36571	2.94883	2.52384	0.303774
14	179.875	169.458	211.882	187.071	18.0517	0	0	0	0	0	2.23269	2.36353	3.75271	2.78297	0.687782
15	215.021	181.909	176.379	191.103	17.0624	0	0	0	0	0	0	0	0	0	0
16	183.241	205.643	216.79	201.891	13.9508	0	0	0	0	0	0	0	0	0	0
Fig. 5e. Reaction products
Code	Total products (mM)
	Repeat 1	Repeat 2	Repeat 3	Average	SD
1	53.1303	52.3323	39.3376	48.2667	6.32224
2	80.9487	82.5591	85.111	82.8729	1.71369
3	66.8868	55.1194	57.4962	59.8341	5.08053
4	69.3022	90.109	95.4451	84.9521	11.2785
5	87.0148	77.7776	48.9037	71.232	16.2326
6	71.2001	93.3688	105.818	90.1291	14.3173
7	102.399	127.282	96.1592	108.613	13.444
8	148.378	131.281	166.802	148.82	14.5049
9	126.289	126.743	161.346	138.126	16.4201
10	173.749	133.16	215.873	174.261	33.7692
11	158.032	123.745	159.521	147.099	16.5249
12	179.093	181.721	194.308	185.041	6.64025
13	147.885	155.184	165.807	156.292	7.35834
14	182.107	171.821	215.634	189.854	18.7067
15	215.021	181.909	176.379	191.103	17.0624
16	183.241	205.643	216.79	201.891	13.9508

## Sheet: fig5. PET film-H
Fig. 5
Time course-PET film-H
Sample construction (at 40℃ pH 7.0, Enz.:Scaf.=0.5:1)
Code	Time	Enzymes			Scaffold
		FAST	MHETase	ICCG	Scaf.3
1	1 d	+	+	+
2		+	+	+	+
3	2 d	+	+	+
4		+	+	+	+
5	3 d	+	+	+
6		+	+	+	+
7	4 d	+	+	+
8		+	+	+	+
9	7 d	+	+	+
10		+	+	+	+
11	10 d	+	+	+
12		+	+	+	+
13	14 d	+	+	+
14		+	+	+	+
15	17 d	+	+	+
16		+	+	+	+
Fig.5f. Reaction products
Code	TPA (mM)					MHET (mM)					BHET (mM)
	Repeat 1	Repeat 2	Repeat 3	Average	SD	Repeat 1	Repeat 2	Repeat 3	Average	SD	Repeat 1	Repeat 2	Repeat 3	Average	SD
1	3.01353	2.96338	2.97709	2.98467	0.0211651	0	0	0	0	0	0	0	0	0	0
2	3.08689	3.05617	3.05222	3.06509	0.0154989	0	0	0	0	0	0	0	0	0	0
3	3.05768	3.06002	3.12468	3.08079	0.0310449	0	0	0	0	0	0	0	0	0	0
4	3.3938	3.26297	3.27747	3.31141	0.0585543	0	0	0	0	0	0	0	0	0	0
5	3.08884	3.01102	3.03337	3.04441	0.0327126	0	0	0	0	0	0	0	0	0	0
6	3.24231	3.62863	3.62552	3.49882	0.181383	0	0	0	0	0	0	0	0	0	0
7	3.11033	3.17196	3.27491	3.18573	0.0678898	0	0	0	0	0	0	0	0	0	0
8	3.24763	3.25721	3.1845	3.22978	0.0322581	0	0	0	0	0	0	0	0	0	0
9	4.03999	4.08639	4.15237	4.09292	0.0461105	0	0	0	0	0	0	0	0	0	0
10	4.49616	4.47976	4.57861	4.51818	0.0432517	0	0	0	0	0	0	0	0	0	0
11	6.87085	6.91603	7.02885	6.93858	0.066444	0	0	0	0	0	0	0	0	0	0
12	7.64299	7.52397	8.1785	7.78182	0.284675	0	0	0	0	0	0	0	0	0	0
13	7.85549	7.77476	7.80886	7.81303	0.0330894	0	0	0	0	0	0	0	0	0	0
14	9.15426	9.0772	8.90707	9.04618	0.103271	0	0	0	0	0	0	0	0	0	0
15	9.13821	8.92741	9.00579	9.0238	0.0869943	0	0	0	0	0	0	0	0	0	0
16	9.34865	9.49209	9.69331	9.51135	0.141364	0	0	0	0	0	0	0	0	0	0
Fig.5f. Reaction products
Code	Total products (mM)
	Repeat 1	Repeat 2	Repeat 3	Average	SD
1	3.01353	2.96338	2.97709	2.98467	0.0211651
2	3.08689	3.05617	3.05222	3.06509	0.0154989
3	3.05768	3.06002	3.12468	3.08079	0.0310449
4	3.3938	3.26297	3.27747	3.31141	0.0585543
5	3.08884	3.01102	3.03337	3.04441	0.0327126
6	3.24231	3.62863	3.62552	3.49882	0.181383
7	3.11033	3.17196	3.27491	3.18573	0.0678898
8	3.24763	3.25721	3.1845	3.22978	0.0322581
9	4.03999	4.08639	4.15237	4.09292	0.0461105
10	4.49616	4.47976	4.57861	4.51818	0.0432517
11	6.87085	6.91603	7.02885	6.93858	0.066444
12	7.64299	7.52397	8.1785	7.78182	0.284675
13	7.85549	7.77476	7.80886	7.81303	0.0330894
14	9.15426	9.0772	8.90707	9.04618	0.103271
15	9.13821	8.92741	9.00579	9.0238	0.0869943
16	9.34865	9.49209	9.69331	9.51135	0.141364

[truncated: 7 more sheets: fig6. SPEED@ZIF-8, fig7. 96hComplex-D&E, fig8. in vivo system, figS7. ratio of Scaf._Enz., figS8. MHETase, figS9. Complex-D, figS11. different P.p]
